# Supplementary material for: The role of group III, IV elements in Nb4AC3MAX phases (A = Al, Si, Ga, Ge) and the unusual anisotropic behavior of the electronic and optical properties
Source: Royal Society of Chemistry journal article supplement (doi:10.1039/c7cp01375b), 2017-01-01
Supplement: c7cp01375b1.pdf [file c7cp01375b1.pdf]

## Supplement Materials

### **The role of group III, IV elements in Nb<sub>4</sub>AC<sub>3</sub> MAX phases (A=Al, Si, Ga, Ge) and the unusual anisotropic behavior of electronic and optical properties**

Fu Yu-dong<sup>a</sup>, Baochang Wang<sup>b,†</sup>, Yue Teng<sup>a</sup>, Zhu Xiao-shuo<sup>a</sup>, Feng Xiao-xue<sup>a</sup>, Yan Mu-fu<sup>c</sup>, Pavel Korzhavyi<sup>d,e</sup>, Weiwei Sun<sup>d,\*</sup>

<sup>a</sup>*School of Material Science and Chemical Engineering & Key Laboratory of Superlight Materials and Surface Technology,*

*Ministry of Education, Harbin Engineering University, Harbin 150001, China*

<sup>b</sup>*Department of Physics and the Competence Centre for Catalysis, Chalmers University of Technology, 41296, Sweden*

**KTH - yal Instit**

**ute of**

**Technology, Stock holm SE - 10044, Sweden.**

**KTH - Royal Institute of**

**Technology, Stock holm SE - 10044, Sweden.**

<sup>c</sup>*School of Material Science and Engineering, Harbin Institute of Technology, Harbin 150001, China*

<sup>d</sup>*Department of Material Science and Engineering, KTH-Royal Institute Technology, Stockholm, SE-10044, Sweden*

<sup>e</sup>*Institute of Metal Physics, Ural Division of the Russian Academy of Sciences, 620219 Ekaterinburg, Russia*

In Fig. S1, it can be seen that the band structure of Nb<sub>4</sub>GaC<sub>3</sub> and Nb<sub>4</sub>AlC<sub>3</sub> are quite similar as Al and Ga have the same number of valence electrons. Similarly, the band structure of Nb<sub>4</sub>SiC<sub>3</sub> and Nb<sub>4</sub>GeC<sub>3</sub> also show similar features. Compared with Nb<sub>4</sub>GaC<sub>3</sub> and Nb<sub>4</sub>AlC<sub>3</sub>, Nb<sub>4</sub>GeC<sub>3</sub> and Nb<sub>4</sub>SiC<sub>3</sub> have more bands across the Fermi level, indicating more states available for intra-band absorption in these two systems, especially for Nb<sub>4</sub>SiC<sub>3</sub>, which can be further verified by the calculated real part of the dielectric function. The Nb<sub>4</sub>GaC<sub>3</sub> has more bands around Fermi level than Nb<sub>4</sub>AlC<sub>3</sub> as well.

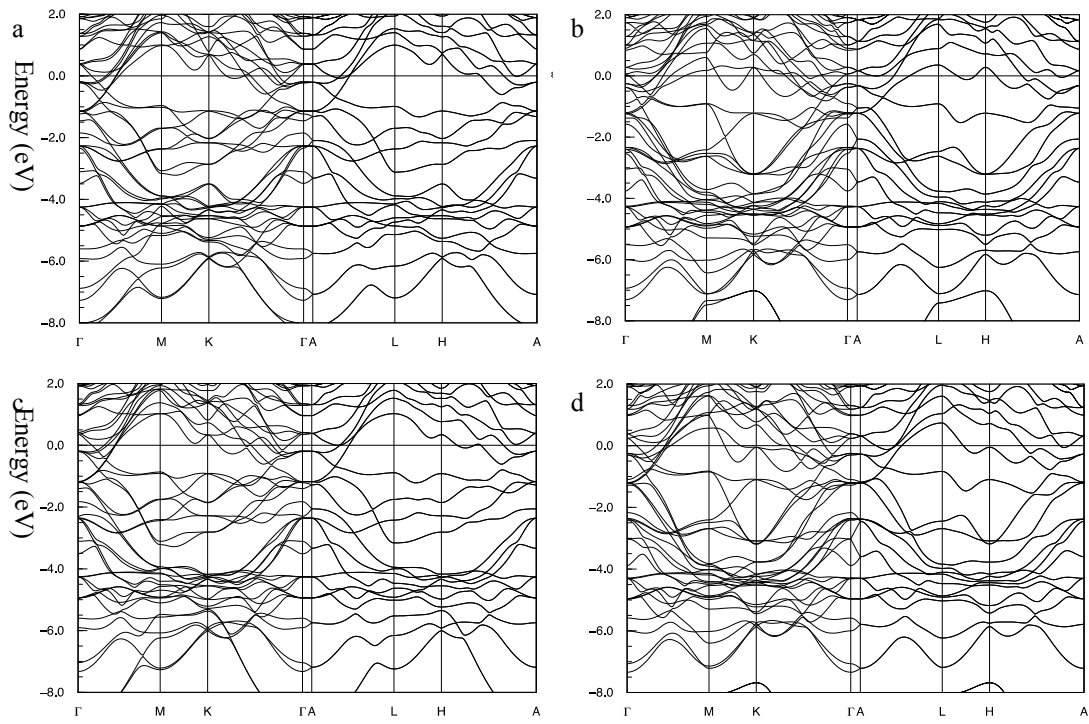

Fig. S1. The band structure of  $\text{Nb}_4\text{AlC}_3$  (a),  $\text{Nb}_4\text{SiC}_3$  (b),  $\text{Nb}_4\text{GaC}_3$  (c), and  $\text{Nb}_4\text{GeC}_3$  (d). The Fermi level is set to be 0 eV.
